# Supplementary material for: A Role for Nonsense-Mediated mRNA Decay in Plants: Pathogen Responses Are Induced in Arabidopsis thaliana NMD Mutants
Source: PLoS One. 2012 Feb 22;7(2):e31917. doi: 10.1371/journal.pone.0031917 (PMC3284524; doi:10.1371/journal.pone.0031917)
Supplement: Table S4 — 23 common NMD genes that are not pathogen responsive, those with a CuORF are highlighted. (XLS) [file pone.0031917.s005.xls]

## Sheet: S4
Table S4. 23 core NMD genes that are not pathogen responsive, those with a CuORF are highlighted
Locus	Probe set
At1g36730	256502_at	256502_at [AT1G36730, eukaryotic translation initiation factor 5, putative / eIF-5, putative];[AT1G36732, CPuORF19 (Conserved peptide upstream open reading frame 19)]
At2g18600	263064_at	263064_at [AT2G18162, CPuORF1 (Conserved peptide upstream open reading frame 1)];[AT2G18160, ATBZIP2/GBF5 (G-BOX BINDING FACTOR 5); DNA binding / protein heterodimerization/ transcription factor]
At5g52550	248310_at	248310_at [AT5G52550, similar to unknown protein [Arabidopsis thaliana] (TAIR:AT4G25670.1); similar to hypothetical protein [Vitis vinifera] (GB:CAN66701.1)];[AT5G52552, CPuORF14 (Conserved peptide upstream open reading frame 14)]
At5g45430	248953_at	248953_at [AT5G45430, protein kinase, putative];[AT5G45428, CPuORF24 (Conserved peptide upstream open reading frame 24)]
At5g64340	247273_at	247273_at [AT5G64342, CPuORF39 (Conserved peptide upstream open reading frame 39)];[AT5G64340, SAC51 (SUPPRESSOR OF ACAULIS 51); transcription factor/ transcription regulator];[AT5G64343, CPuORF38 (Conserved peptide upstream open reading frame 38)];[AT5G64341, CPuORF40 (Conserved peptide upstream open reading frame 40)]
At5g03190	250955_at	250955_at CPuORF47 (Conserved peptide upstream open reading frame 47)
At3g18000	258218_at	258218_at [AT3G17998, CPuORF30 (Conserved peptide upstream open reading frame 30)];[AT3G18000, NMT1 (N-METHYLTRANSFERASE 1); phosphoethanolamine N-methyltransferase]
At1g29950	260027_at	260027_at [AT1G29952, CPuORF34 (Conserved peptide upstream open reading frame 34)];[AT1G29950, transcription factor/ transcription regulator];[AT1G29951, CPuORF35 (Conserved peptide upstream open reading frame 35)]
At4g15440	245253_at	245253_at HPL1 (HYDROPEROXIDE LYASE 1); heme binding / iron ion binding / monooxygenase
At1g05160	264586_at	264586_at CYP88A3 (ENT-KAURENOIC ACID HYDROXYLASE 1); oxygen binding
At3g55520	251799_at	251799_at immunophilin, putative / FKBP-type peptidyl-prolyl cis-trans isomerase, putative
At2g30790	267569_at	267569_at PSBP-2 (photosystem II subunit P-2); calcium ion binding
At1g78290	260774_at	260774_at serine/threonine protein kinase, putative
At1g07010	256049_at	256049_at calcineurin-like phosphoesterase family protein
At5g59780	247696_at	247696_at MYB59 (myb domain protein 59); DNA binding / transcription factor
At5g42760	249191_at	249191_at similar to unknown [Populus trichocarpa] (GB:ABK95091.1); contains InterPro domain O-methyltransferase, N-terminal (InterPro:IPR003455); contains InterPro domain Conserved hypothetical protein CHP00027, methylltransferase (InterPro:IPR011610)
At5g35490	249727_at	249727_at unknown protein
At5g03555	250926_at	250926_at permease, cytosine/purines, uracil, thiamine, allantoin family protein
At3g26540	257616_at	257616_at pentatricopeptide (PPR) repeat-containing protein
At1g59930	262902_x_	262902_x_at similar to unknown protein [Arabidopsis thaliana] (TAIR:AT1G59920.1); similar to putative MADS-box transcription factor [Arabidopsis lyrata] (GB:AAO42467.1); contains domain PTHR11945 (PTHR11945); contains domain PTHR11945:SF14 (PTHR11945:SF14)
At3g26320	256874_at	256874_at CYP71B36 (cytochrome P450, family 71, subfamily B, polypeptide 36); oxygen binding
At3g06210	257580_at	257580_at binding
At1g52000	265053_at	265053_at jacalin lectin family protein
